# Supplementary material
Source: PubMed Central journal article supplement (PMC4850216)

## Supplementary Materials.

**Fig.1: *FLNB*, *VE-cad*, *VE-PTP* and *CD133*, are up-regulated by hypoxia in Glio5.**

RNAs were extracted from glioma stem cell cultures constantly maintained under normoxia (3% O<sub>2</sub>) or exposed to hypoxia (0.3% O<sub>2</sub>) for 48 hours. Glio5 cells were cultured as neurospheres in serum-free medium. RT-qPCR analysis was performed with primers specific for *FLNB*, *VE-cad*, *VE-PTP*, and *CD133*. Expression levels were normalized relative to the expression level of  $\beta$ -actin. Values are calculated by  $2^{-(Ct_{\text{gene of interest}} - Ct_{\text{betaactin}})}$ ; \*  $p \leq 0.05$ .

**Table I: Genes differentially regulated in U87 glioma when cells are shifted from 20% to 0.3% O<sub>2</sub>**

| <b>Probe Set ID</b> | <b>Gene Symbol</b> | <b>U87 Ratio<br/>0.3% vs 20% O<sub>2</sub></b> |
|---------------------|--------------------|------------------------------------------------|
| 214293_at           | ---                | 23,25                                          |
| 209183_s_at         | C10orf10           | 14,07                                          |
| 219434_at           | TREM1              | 13,00                                          |
| 212143_s_at         | IGFBP3             | 11,29                                          |
| 204363_at           | F3                 | 9,30                                           |
| 205199_at           | CA9                | 8,99                                           |
| 237335_at           | ZP1                | 8,27                                           |
| 219888_at           | SPAG4              | 7,21                                           |
| 218507_at           | C7orf68            | 5,83                                           |
| 201250_s_at         | SLC2A1             | 5,69                                           |
| 236915_at           | C4orf47            | 5,49                                           |
| 232693_s_at         | FBXO16 /// ZNF395  | 5,40                                           |
| 205832_at           | CPA4               | 5,20                                           |
| 228262_at           | MAP7D2             | 5,17                                           |
| 239619_at           | ---                | 5,06                                           |
| 221123_x_at         | ZNF395             | 5,05                                           |
| 219410_at           | TMEM45A            | 5,02                                           |
| 228483_s_at         | TAF9B              | 4,91                                           |
| 235850_at           | WDR5B              | 4,77                                           |
| 200632_s_at         | NDRG1              | 4,62                                           |
| 202022_at           | ALDOC              | 4,53                                           |
| 225342_at           | AK3L1              | 4,50                                           |
| 232451_at           | ---                | 4,39                                           |
| 228843_at           | ---                | 4,33                                           |
| 203325_s_at         | COL5A1             | 4,32                                           |
| 205200_at           | CLEC3B             | 4,29                                           |
| 215446_s_at         | LOX                | 4,26                                           |
| 214978_s_at         | PPFIA4             | 4,24                                           |
| 236480_at           | ---                | 4,16                                           |
| 203407_at           | PPL                | 4,10                                           |
| 209859_at           | TRIM9              | 4,05                                           |
| 226348_at           | ---                | 4,02                                           |
| 202887_s_at         | DDIT4              | 3,99                                           |
| 236180_at           | ---                | 3,87                                           |
| 204971_at           | CSTA               | 3,81                                           |
| 230710_at           | ---                | 3,76                                           |
| 204284_at           | PPP1R3C            | 3,72                                           |
| 221009_s_at         | ANGPTL4            | 3,62                                           |

|             |         |      |
|-------------|---------|------|
| 226899_at   | UNC5B   | 3,57 |
| 238965_at   | C21orf2 | 3,52 |
| 204508_s_at | CA12    | 3,49 |
| 205493_s_at | DPYSL4  | 3,48 |
| 226347_at   | ---     | 3,48 |
| 226452_at   | PDK1    | 3,44 |
| 202364_at   | MXI1    | 3,42 |
| 227337_at   | ANKRD37 | 3,41 |
| 219213_at   | JAM2    | 3,34 |
| 230498_at   | MCHR1   | 3,32 |
| 213332_at   | PAPPA2  | 3,32 |
| 219310_at   | TMEM90B | 3,30 |
| 209566_at   | INSIG2  | 3,17 |
| 228499_at   | PFKFB4  | 3,13 |
| 203574_at   | NFIL3   | 3,07 |
| 226436_at   | RASSF4  | 2,98 |
| 222847_s_at | EGLN3   | 2,98 |
| 45714_at    | HCFC1R1 | 2,98 |
| 203438_at   | STC2    | 2,97 |
| 243444_at   | SRD5A3  | 2,94 |
| 201195_s_at | SLC7A5  | 2,94 |
| 230695_s_at | RSPH9   | 2,93 |
| 1569263_at  | ---     | 2,91 |
| 220942_x_at | FAM162A | 2,89 |
| 221766_s_at | FAM46A  | 2,88 |
| 236110_at   | ---     | 2,87 |
| 201673_s_at | GYS1    | 2,80 |
| 213843_x_at | SLC6A8  | 2,80 |
| 202769_at   | CCNG2   | 2,79 |
| 213693_s_at | MUC1    | 2,78 |
| 213438_at   | NFASC   | 2,77 |
| 201010_s_at | TXNIP   | 2,77 |
| 206258_at   | ST8SIA5 | 2,75 |
| 213169_at   | SEMA5A  | 2,73 |
| 214268_s_at | MTMR4   | 2,73 |
| 228575_at   | IL20RB  | 2,73 |
| 202912_at   | ADM     | 2,73 |
| 227068_at   | PGK1    | 2,72 |
| 201148_s_at | TIMP3   | 2,71 |
| 201849_at   | BNIP3   | 2,69 |
| 232914_s_at | SYTL2   | 2,69 |
| 224657_at   | ERRFI1  | 2,66 |
| 236036_at   | ---     | 2,66 |
| 210237_at   | ARTN    | 2,64 |
| 225750_at   | ---     | 2,61 |

|              |                                      |      |
|--------------|--------------------------------------|------|
| 226925_at    | ACPL2                                | 2,56 |
| 202575_at    | CRABP2                               | 2,55 |
| 1556629_a_at | SNAP25                               | 2,54 |
| 223839_s_at  | SCD                                  | 2,53 |
| 218934_s_at  | HSPB7                                | 2,53 |
| 205302_at    | IGFBP1                               | 2,51 |
| 202856_s_at  | SLC16A3                              | 2,50 |
| 224602_at    | C4orf3                               | 2,50 |
| 227326_at    | MXRA7                                | 2,50 |
| 212496_s_at  | KDM4B                                | 2,49 |
| 209333_at    | ULK1                                 | 2,46 |
| 209185_s_at  | IRS2                                 | 2,44 |
| 223046_at    | EGLN1                                | 2,44 |
| 202897_at    | SIRPA                                | 2,44 |
| 235916_at    | YPEL4                                | 2,43 |
| 202016_at    | MEST                                 | 2,43 |
| 240042_at    | FIBCD1                               | 2,41 |
| 205141_at    | ANG                                  | 2,39 |
| 1568611_at   | ---                                  | 2,39 |
| 228340_at    | TLE3                                 | 2,38 |
| 222245_s_at  | FER1L4                               | 2,38 |
| 202291_s_at  | MGP                                  | 2,37 |
| 221211_s_at  | C21orf7                              | 2,35 |
| 225990_at    | BOC                                  | 2,35 |
| 201313_at    | ENO2                                 | 2,35 |
| 223502_s_at  | TNFSF13B                             | 2,35 |
| 209119_x_at  | NR2F2                                | 2,35 |
| 226325_at    | ADSSL1                               | 2,34 |
| 203296_s_at  | ATP1A2                               | 2,34 |
| 202464_s_at  | PFKFB3                               | 2,34 |
| 214101_s_at  | ---                                  | 2,33 |
| 222856_at    | APLN                                 | 2,33 |
| 226189_at    | ITGB8                                | 2,32 |
| 244069_at    | ---                                  | 2,32 |
| 212155_at    | RNF187                               | 2,32 |
| 215812_s_at  | LOC653562 /// SLC6A10P ///<br>SLC6A8 | 2,31 |
| 218625_at    | NRN1                                 | 2,31 |
| 1554704_at   | ATP8B3                               | 2,31 |
| 203710_at    | ITPR1                                | 2,29 |
| 210511_s_at  | INHBA                                | 2,28 |
| 205374_at    | SLN                                  | 2,27 |
| 230864_at    | MGC42105                             | 2,27 |
| 202619_s_at  | PLOD2                                | 2,26 |
| 222450_at    | PMEPA1                               | 2,26 |

|              |                    |      |
|--------------|--------------------|------|
| 209982_s_at  | NRXN2              | 2,26 |
| 204730_at    | RIMS3              | 2,25 |
| 227195_at    | ZNF503             | 2,23 |
| 231403_at    | TRIO               | 2,23 |
| 229822_at    | ---                | 2,22 |
| 235467_s_at  | KCNC4              | 2,22 |
| 223703_at    | C10orf11           | 2,20 |
| 228959_at    | ---                | 2,20 |
| 221864_at    | ORAI3              | 2,19 |
| 202934_at    | HK2                | 2,19 |
| 225649_s_at  | STK35              | 2,18 |
| 230085_at    | ---                | 2,18 |
| 238617_at    | ---                | 2,17 |
| 230560_at    | STXBP6             | 2,16 |
| 237460_x_at  | C14orf182          | 2,15 |
| 229382_at    | C1orf183           | 2,15 |
| 212713_at    | MFAP4              | 2,13 |
| 213256_at    | MARCH3             | 2,13 |
| 229898_at    | ---                | 2,12 |
| 212593_s_at  | PDCD4              | 2,12 |
| 221479_s_at  | BNIP3L             | 2,12 |
| 210749_x_at  | DDR1               | 2,11 |
| 202235_at    | SLC16A1            | 2,11 |
| 1555579_s_at | PTPRM              | 2,11 |
| 203813_s_at  | SLIT3              | 2,10 |
| 209656_s_at  | TMEM47             | 2,09 |
| 201785_at    | RNASE1             | 2,08 |
| 208779_x_at  | DDR1               | 2,07 |
| 238116_at    | DYNLRB2            | 2,07 |
| 222108_at    | AMIGO2             | 2,05 |
| 59625_at     | NOL3               | 2,05 |
| 1559960_x_at | LOC100130958       | 2,04 |
| 231178_at    | SPATA4             | 2,03 |
| 210677_at    | SOAT2              | 2,03 |
| 225626_at    | PAG1               | 2,03 |
| 221261_x_at  | MAGED4 /// MAGED4B | 2,01 |
| 213629_x_at  | MT1F               | 2,01 |
| 203973_s_at  | CEBPD              | 2,00 |
| 238151_at    | ---                | 2,00 |
| 208320_at    | CABP1              | 1,98 |
| 203282_at    | GBE1               | 1,98 |
| 204595_s_at  | STC1               | 1,97 |
| 225146_at    | C9orf25            | 1,96 |
| 225717_at    | KIAA1715           | 1,96 |
| 1007_s_at    | DDR1               | 1,96 |

|             |           |      |
|-------------|-----------|------|
| 205497_at   | ZNF175    | 1,96 |
| 208935_s_at | LGALS8    | 1,96 |
| 207020_at   | HSF2BP    | 1,95 |
| 201701_s_at | PGRMC2    | 1,95 |
| 226424_at   | CAPS      | 1,94 |
| 201968_s_at | PGM1      | 1,94 |
| 241230_at   | ---       | 1,93 |
| 205022_s_at | FOXN3     | 1,93 |
| 201919_at   | SLC25A36  | 1,93 |
| 216272_x_at | SYDE1     | 1,93 |
| 203986_at   | STBD1     | 1,93 |
| 226517_at   | BCAT1     | 1,92 |
| 202497_x_at | SLC2A3    | 1,92 |
| 213273_at   | ODZ4      | 1,91 |
| 212154_at   | SDC2      | 1,91 |
| 44702_at    | SYDE1     | 1,89 |
| 241992_at   | DRAM      | 1,89 |
| 213059_at   | CREB3L1   | 1,88 |
| 202237_at   | NNMT      | 1,87 |
| 209356_x_at | EFEMP2    | 1,85 |
| 226342_at   | SPTBN1    | 1,85 |
| 225057_at   | SLC15A4   | 1,84 |
| 229810_at   | ---       | 1,84 |
| 230941_at   | LOC728537 | 1,84 |
| 211065_x_at | PFKL      | 1,84 |
| 35617_at    | MAPK7     | 1,84 |
| 205575_at   | C1QL1     | 1,84 |
| 201667_at   | GJA1      | 1,83 |
| 221953_s_at | LOC729580 | 1,83 |
| 240873_x_at | DAB2      | 1,83 |
| 241348_at   | ZNF654    | 1,83 |
| 203159_at   | GLS       | 1,83 |
| 204900_x_at | SAP30     | 1,83 |
| 224992_s_at | CMIP      | 1,83 |
| 225704_at   | FBRSL1    | 1,82 |
| 218002_s_at | CXCL14    | 1,82 |
| 221203_s_at | YEATS2    | 1,81 |
| 1559776_at  | ---       | 1,81 |
| 228008_at   | ---       | 1,80 |
| 222288_at   | ---       | 1,80 |
| 36711_at    | MAFF      | 1,80 |
| 210512_s_at | VEGFA     | 1,80 |
| 217949_s_at | VKORC1    | 1,80 |
| 203749_s_at | RARA      | 1,80 |
| 228080_at   | LAYN      | 1,80 |

|             |                 |      |
|-------------|-----------------|------|
| 225056_at   | SIPA1L2         | 1,80 |
| 222221_x_at | EHD1            | 0,55 |
| 218398_at   | MRPS30          | 0,55 |
| 215506_s_at | DIRAS3          | 0,55 |
| 233970_s_at | TRMT6           | 0,55 |
| 219581_at   | TSEN2           | 0,55 |
| 205770_at   | GSR             | 0,55 |
| 208910_s_at | C1QBP           | 0,55 |
| 200790_at   | ODC1            | 0,55 |
| 203708_at   | PDE4B           | 0,54 |
| 211379_x_at | B3GALNT1        | 0,54 |
| 1555091_at  | PPM1F           | 0,54 |
| 222417_s_at | SNX5            | 0,54 |
| 225143_at   | SFXN4           | 0,53 |
| 225571_at   | LIFR            | 0,53 |
| 203499_at   | EPHA2           | 0,53 |
| 228366_at   | ---             | 0,53 |
| 221581_s_at | LAT2            | 0,53 |
| 226319_s_at | THOC4           | 0,52 |
| 225301_s_at | MYO5B           | 0,52 |
| 225827_at   | EIF2C2          | 0,51 |
| 228098_s_at | MYLIP           | 0,51 |
| 222837_s_at | NARG1           | 0,50 |
| 202069_s_at | IDH3A           | 0,50 |
| 218772_x_at | TMEM38B         | 0,50 |
| 235117_at   | CHAC2           | 0,50 |
| 207891_s_at | HAUS7 /// TREX2 | 0,49 |
| 229236_s_at | SFXN4           | 0,49 |
| 221606_s_at | NSBP1           | 0,48 |
| 223296_at   | SLC25A33        | 0,48 |
| 205479_s_at | PLAU            | 0,48 |
| 239177_at   | IRGQ            | 0,47 |
| 234987_at   | ---             | 0,47 |
| 205364_at   | ACOX2           | 0,46 |
| 1569190_at  | SCLT1           | 0,46 |
| 204933_s_at | TNFRSF11B       | 0,44 |
| 203083_at   | THBS2           | 0,44 |
| 223580_at   | SPSB2           | 0,44 |
| 1570153_at  | C13orf38        | 0,43 |
| 221252_s_at | GSG1            | 0,43 |
| 220122_at   | MCTP1           | 0,42 |
| 224909_s_at | PREX1           | 0,39 |
| 210145_at   | PLA2G4A         | 0,37 |
| 205576_at   | SERPIND1        | 0,36 |
| 210662_at   | KYNU            | 0,35 |

|           |        |      |
|-----------|--------|------|
| 204439_at | IFI44L | 0,35 |
| 229349_at | LIN28B | 0,35 |
| 206693_at | IL7    | 0,31 |



**Table II: Genes differentially regulated in Glioblastoma cells cultured in serum-free medium when cultures are shifted from 3% to 0.3% O<sub>2</sub>.**

| <b>Probe Set ID</b> | <b>Gene Symbol</b>   | <b>Glioblastoma Ratio<br/>0.3% vs 3% O<sub>2</sub></b> |
|---------------------|----------------------|--------------------------------------------------------|
| 203438_at           | STC2                 | 10,02                                                  |
| 222847_s_at         | EGLN3                | 7,73                                                   |
| 226452_at           | PDK1                 | 5,24                                                   |
| 202912_at           | ADM                  | 4,88                                                   |
| 202934_at           | HK2                  | 4,37                                                   |
| 202856_s_at         | SLC16A3              | 4,33                                                   |
| 208614_s_at         | FLNB                 | 4,25                                                   |
| 204304_s_at         | PROM1                | 4,11                                                   |
| 230498_at           | MCHR1                | 4,00                                                   |
| 228483_s_at         | TAF9B                | 3,94                                                   |
| 202887_s_at         | DDIT4                | 3,91                                                   |
| 236480_at           | ---                  | 3,89                                                   |
| 235850_at           | WDR5B                | 3,86                                                   |
| 201170_s_at         | BHLHE40              | 3,84                                                   |
| 209493_at           | PDZD2                | 3,78                                                   |
| 236915_at           | C4orf47              | 3,67                                                   |
| 225283_at           | ARRDC4               | 3,53                                                   |
| 219410_at           | TMEM45A              | 3,44                                                   |
| 210675_s_at         | PTPRR                | 3,44                                                   |
| 230250_at           | PTPRB                | 3,37                                                   |
| 1555997_s_at        | IGFBP5               | 3,28                                                   |
| 227868_at           | LOC154761            | 3,24                                                   |
| 210512_s_at         | VEGFA                | 3,20                                                   |
| 202998_s_at         | LOXL2                | 3,13                                                   |
| 202022_at           | ALDOC                | 3,06                                                   |
| 230710_at           | ---                  | 2,99                                                   |
| 220942_x_at         | FAM162A              | 2,95                                                   |
| 201010_s_at         | TXNIP                | 2,88                                                   |
| 225342_at           | AK3L1                | 2,86                                                   |
| 226682_at           | RORA                 | 2,86                                                   |
| 200827_at           | PLOD1                | 2,77                                                   |
| 204677_at           | CDH5                 | 2,74                                                   |
| 214978_s_at         | PPFIA4               | 2,71                                                   |
| 201565_s_at         | ID2                  | 2,68                                                   |
| 232693_s_at         | FBXO16 ///<br>ZNF395 | 2,68                                                   |
| 212364_at           | MYO1B                | 2,64                                                   |
| 205199_at           | CA9                  | 2,64                                                   |

|              |          |      |
|--------------|----------|------|
| 227068_at    | PGK1     | 2,64 |
| 221123_x_at  | ZNF395   | 2,62 |
| 201849_at    | BNIP3    | 2,56 |
| 1552256_a_at | SCARB1   | 2,54 |
| 224797_at    | ARRDC3   | 2,49 |
| 200878_at    | EPAS1    | 2,47 |
| 228057_at    | DDIT4L   | 2,45 |
| 214043_at    | PTPRD    | 2,42 |
| 219622_at    | RAB20    | 2,39 |
| 230630_at    | ---      | 2,38 |
| 218717_s_at  | LEPREL1  | 2,38 |
| 201250_s_at  | SLC2A1   | 2,35 |
| 227271_at    | FGF11    | 2,27 |
| 207543_s_at  | P4HA1    | 2,24 |
| 205970_at    | MT3      | 2,22 |
| 1553159_at   | DNAH11   | 2,21 |
| 228499_at    | PFKFB4   | 2,20 |
| 200632_s_at  | NDRG1    | 2,20 |
| 202497_x_at  | SLC2A3   | 2,19 |
| 240055_at    | ---      | 2,17 |
| 232451_at    | ---      | 2,15 |
| 212689_s_at  | KDM3A    | 2,15 |
| 202524_s_at  | SPOCK2   | 2,14 |
| 211685_s_at  | NCALD    | 2,11 |
| 223046_at    | EGLN1    | 2,08 |
| 202733_at    | P4HA2    | 2,02 |
| 203282_at    | GBE1     | 2,02 |
| 205204_at    | NMB      | 2,02 |
| 223276_at    | MST150   | 2,01 |
| 227168_at    | MIAT     | 1,99 |
| 201313_at    | ENO2     | 1,99 |
| 208321_s_at  | CABP1    | 1,97 |
| 221479_s_at  | BNIP3L   | 1,97 |
| 218484_at    | NDUFA4L2 | 1,97 |
| 228770_at    | GPR146   | 1,96 |
| 236180_at    | ---      | 1,96 |
| 200795_at    | SPARCL1  | 1,93 |
| 203710_at    | ITPR1    | 1,93 |
| 208308_s_at  | GPI      | 1,90 |
| 223172_s_at  | MTP18    | 1,90 |
| 1558834_s_at | C1orf62  | 1,87 |
| 238996_x_at  | ALDOA    | 1,85 |
| 212776_s_at  | OBSL1    | 1,84 |
| 225750_at    | ---      | 1,84 |
| 218995_s_at  | EDN1     | 1,83 |

|             |        |      |
|-------------|--------|------|
| 211026_s_at | MGLL   | 1,83 |
| 219670_at   | BEND5  | 1,82 |
| 226347_at   | ---    | 1,82 |
| 229156_s_at | ---    | 1,81 |
| 227529_s_at | AKAP12 | 1,80 |

**Table III: Genes differentially regulated in Glioblastoma cells cultured in the presence of 10% fetal calf serum when cultures are shifted from 3% O<sub>2</sub> to 0.3% O<sub>2</sub>.**

| <b>Probe Set ID</b> | <b>Gene Symbol</b> | <b>Glioblastoma FCS Ratio<br/>0.3% vs 3% O<sub>2</sub></b> |
|---------------------|--------------------|------------------------------------------------------------|
| 204748_at           | PTGS2              | 5,46                                                       |
| 219232_s_at         | EGLN3              | 4,98                                                       |
| 230250_at           | PTPRB              | 4,91                                                       |
| 202934_at           | HK2                | 4,18                                                       |
| 235850_at           | WDR5B              | 4,15                                                       |
| 202887_s_at         | DDIT4              | 4,09                                                       |
| 203438_at           | STC2               | 3,94                                                       |
| 225342_at           | AK3L1              | 3,75                                                       |
| 201010_s_at         | TXNIP              | 3,46                                                       |
| 228483_s_at         | TAF9B              | 3,44                                                       |
| 226452_at           | PDK1               | 3,25                                                       |
| 204304_s_at         | PROM1              | 3,25                                                       |
| 205199_at           | CA9                | 3,20                                                       |
| 1553770_a_at        | SLAMF9             | 3,12                                                       |
| 227868_at           | LOC154761          | 3,09                                                       |
| 221123_x_at         | ZNF395             | 3,08                                                       |
| 232693_s_at         | FBXO16 /// ZNF395  | 3,06                                                       |
| 226682_at           | RORA               | 2,94                                                       |
| 202912_at           | ADM                | 2,93                                                       |
| 210675_s_at         | PTPRR              | 2,88                                                       |
| 219410_at           | TMEM45A            | 2,84                                                       |
| 236480_at           | ---                | 2,71                                                       |
| 228057_at           | DDIT4L             | 2,71                                                       |
| 201250_s_at         | SLC2A1             | 2,70                                                       |
| 209031_at           | CADM1              | 2,61                                                       |
| 220942_x_at         | FAM162A            | 2,54                                                       |
| 217028_at           | CXCR4              | 2,51                                                       |
| 236180_at           | ---                | 2,50                                                       |
| 202856_s_at         | SLC16A3            | 2,49                                                       |
| 1552256_a_at        | SCARB1             | 2,47                                                       |
| 213397_x_at         | RNASE4             | 2,46                                                       |
| 232451_at           | ---                | 2,42                                                       |
| 236915_at           | C4orf47            | 2,38                                                       |
| 236513_at           | ---                | 2,37                                                       |
| 228635_at           | PCDH10             | 2,37                                                       |
| 230710_at           | ---                | 2,31                                                       |
| 201313_at           | ENO2               | 2,29                                                       |

|             |                    |      |
|-------------|--------------------|------|
| 201849_at   | BNIP3              | 2,29 |
| 202524_s_at | SPOCK2             | 2,27 |
| 242868_at   | ---                | 2,27 |
| 210512_s_at | VEGFA              | 2,25 |
| 201170_s_at | BHLHE40            | 2,25 |
| 209348_s_at | MAF                | 2,25 |
| 216236_s_at | SLC2A14 /// SLC2A3 | 2,23 |
| 218723_s_at | C13orf15           | 2,21 |
| 219670_at   | BEND5              | 2,21 |
| 225962_at   | ZNRF1              | 2,20 |
| 205204_at   | NMB                | 2,20 |
| 227068_at   | PGK1               | 2,18 |
| 204508_s_at | CA12               | 2,18 |
| 224797_at   | ARRDC3             | 2,18 |
| 211782_at   | IDS                | 2,16 |
| 208614_s_at | FLNB               | 2,15 |
| 218995_s_at | EDN1               | 2,13 |
| 227717_at   | FLJ41603           | 2,11 |
| 209309_at   | AZGP1              | 2,11 |
| 207543_s_at | P4HA1              | 2,09 |
| 208320_at   | CABP1              | 2,08 |
| 211026_s_at | MGLL               | 2,07 |
| 200878_at   | EPAS1              | 2,06 |
| 230711_at   | ---                | 2,04 |
| 204730_at   | RIMS3              | 2,02 |
| 202497_x_at | SLC2A3             | 2,01 |
| 204677_at   | CDH5               | 2,01 |
| 218218_at   | APPL2              | 1,99 |
| 227004_at   | ---                | 1,99 |
| 202998_s_at | LOXL2              | 1,98 |
| 235419_at   | ---                | 1,97 |
| 203710_at   | ITPR1              | 1,96 |
| 234725_s_at | SEMA4B             | 1,96 |
| 212364_at   | MYO1B              | 1,96 |
| 200632_s_at | NDRG1              | 1,96 |
| 202221_s_at | EP300              | 1,96 |
| 227271_at   | FGF11              | 1,96 |
| 223046_at   | EGLN1              | 1,95 |
| 200827_at   | PLOD1              | 1,95 |
| 225750_at   | ---                | 1,92 |
| 208876_s_at | PAK2               | 1,92 |
| 205227_at   | IL1RAP             | 1,91 |
| 221479_s_at | BNIP3L             | 1,91 |
| 242051_at   | ---                | 1,91 |
| 214862_x_at | ---                | 1,90 |

|              |         |      |
|--------------|---------|------|
| 213493_at    | SNED1   | 1,90 |
| 202341_s_at  | TRIM2   | 1,90 |
| 212488_at    | COL5A1  | 1,89 |
| 214068_at    | BEAN    | 1,89 |
| 209566_at    | INSIG2  | 1,88 |
| 205249_at    | EGR2    | 1,88 |
| 202620_s_at  | PLOD2   | 1,87 |
| 232990_at    | FAM104B | 1,87 |
| 237169_at    | ---     | 1,85 |
| 212143_s_at  | IGFBP3  | 1,84 |
| 212689_s_at  | KDM3A   | 1,84 |
| 209357_at    | CITED2  | 1,83 |
| 238965_at    | C21orf2 | 1,82 |
| 232744_x_at  | ---     | 1,82 |
| 237585_at    | C4orf47 | 1,81 |
| 203563_at    | AFAP1   | 1,81 |
| 203282_at    | GBE1    | 1,81 |
| 220914_at    | ---     | 1,81 |
| 238914_at    | DCC     | 1,81 |
| 1564028_s_at | FAM115C | 1,80 |
| 210215_at    | TFR2    | 1,80 |

**Table IV.**

**Sequences of the primers used in the RT-qPCR experiments**

| <b>Gene</b>   | <b>Forward (5'-3')</b> | <b>Reverse (3'-5')</b>  |
|---------------|------------------------|-------------------------|
| <i>Actin</i>  | tgttttctgcaagtagg      | ctctgagcgcaagtactcc     |
| <i>CD133</i>  | cagcagagagcagatgacca   | tccacagaaattacctacattgg |
| <i>VE-PTP</i> | gtgatcctcaggtcggtgac   | caaggaagcccagactgaag    |
| <i>VE-cad</i> | ctggccctgtcactggt      | aagccttgattggcacagt     |
| <i>FLNB</i>   | acataggcctcttcggtcac   | tcactgtcatggccacagat    |

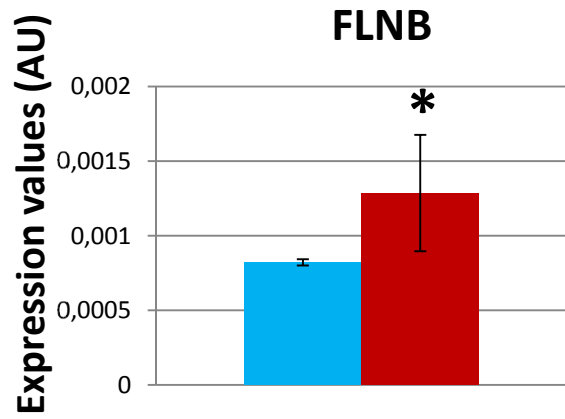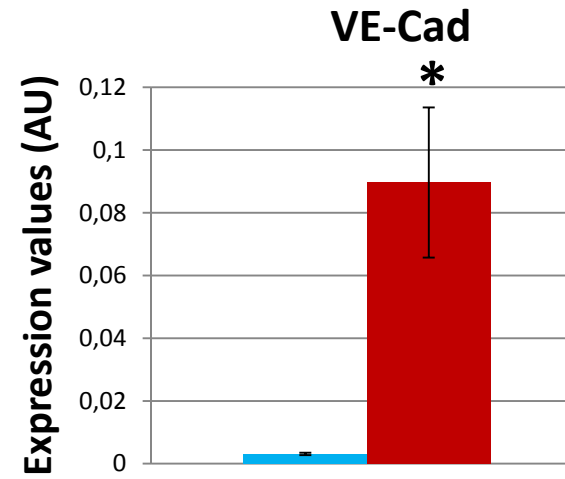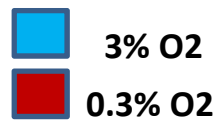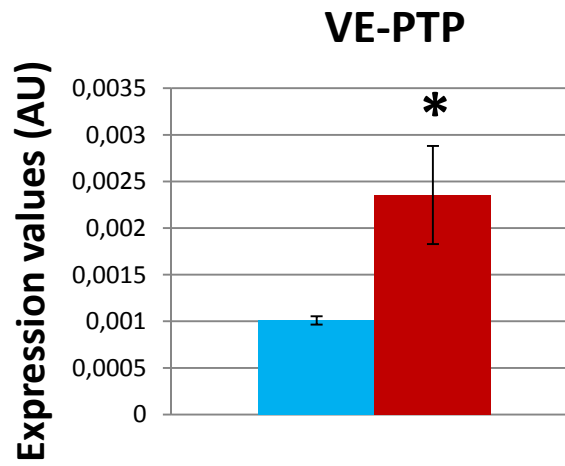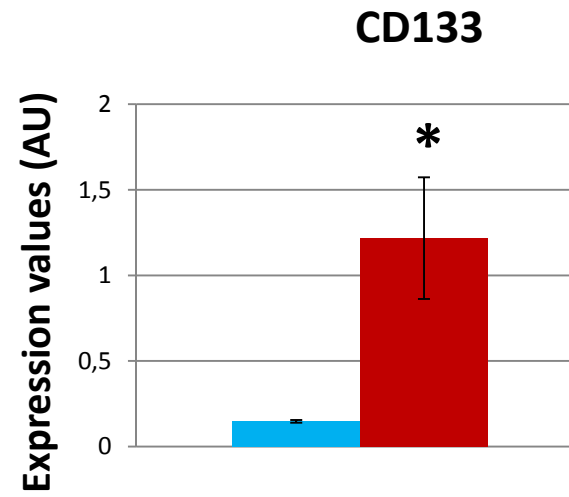

Supplement: halms1194524-supplement_1.pdf [file halms1194524-supplement_1.pdf]
